# Supplementary material for: Predicted Archaic 3D Genome Organization Reveals Genes Related to Head and Spinal Cord Separating Modern from Archaic Humans
Source: MDPI journal article supplement (doi:10.3390/cells9010048), 2019-12-24
Supplement: s1 [file s1]

## Supplementary Materials

### Tables

**Table S1.** Number and median length of identified TADs in four different cell types. Data are taken from [6].

| Cell Type | # TADs | Median TAD Length |
|-----------|--------|-------------------|
| HMEC      | 4096   | 230,000           |
| HUVEC     | 4173   | 270,000           |
| IMR90     | 7680   | 280,000           |
| NHEK      | 6015   | 250,000           |

**Table S2.** MH-derived DMRs tend to reside inside TADs.

|                                                      | Intersection-TADs        | Union-TADs               |
|------------------------------------------------------|--------------------------|--------------------------|
| Observed fraction of DMRs in TADs                    | 0.43986                  | 0.48225                  |
| # of MH-DMRs inside TAD                              | 384                      | 421                      |
| Total # of MH-DMRs                                   | 873                      |                          |
| Expected fraction of DMRs in TADs (from simulations) | 0.31897                  | 0.35818                  |
| p-value of Monte Carlo simulation                    | $p < 0.005$              | $p < 0.005$              |
| P-value of $\chi^2$ -test                            | $p = 1.8 \cdot 10^{-14}$ | $p = 2.1 \cdot 10^{-14}$ |

**Table S3.** MH-derived DMRs tend to reside close to TAD boundaries.

| (Only DMRs Inside TADs)                                                   | Intersection-TADs        | Union-TADs               |
|---------------------------------------------------------------------------|--------------------------|--------------------------|
| Observed fraction of DMRs within 50 kb of TAD boundary                    | 0.73177                  | 0.66983                  |
| # MH-DMRs –TAD end < 50 kb                                                | 281                      | 282                      |
| Total # of MH-DMRs inside TADs                                            | 384                      | 421                      |
| Expected fraction of DMRs within 50 kb of TAD boundary (from simulations) | 0.35229                  | 0.30705                  |
| p-value of Monte Carlo simulation                                         | $P < 10^{-4}$            | $P < 10^{-4}$            |
| p-value $\chi^2$ -test                                                    | $P = 1.2 \cdot 10^{-54}$ | $P = 1.4 \cdot 10^{-58}$ |

**Figure**

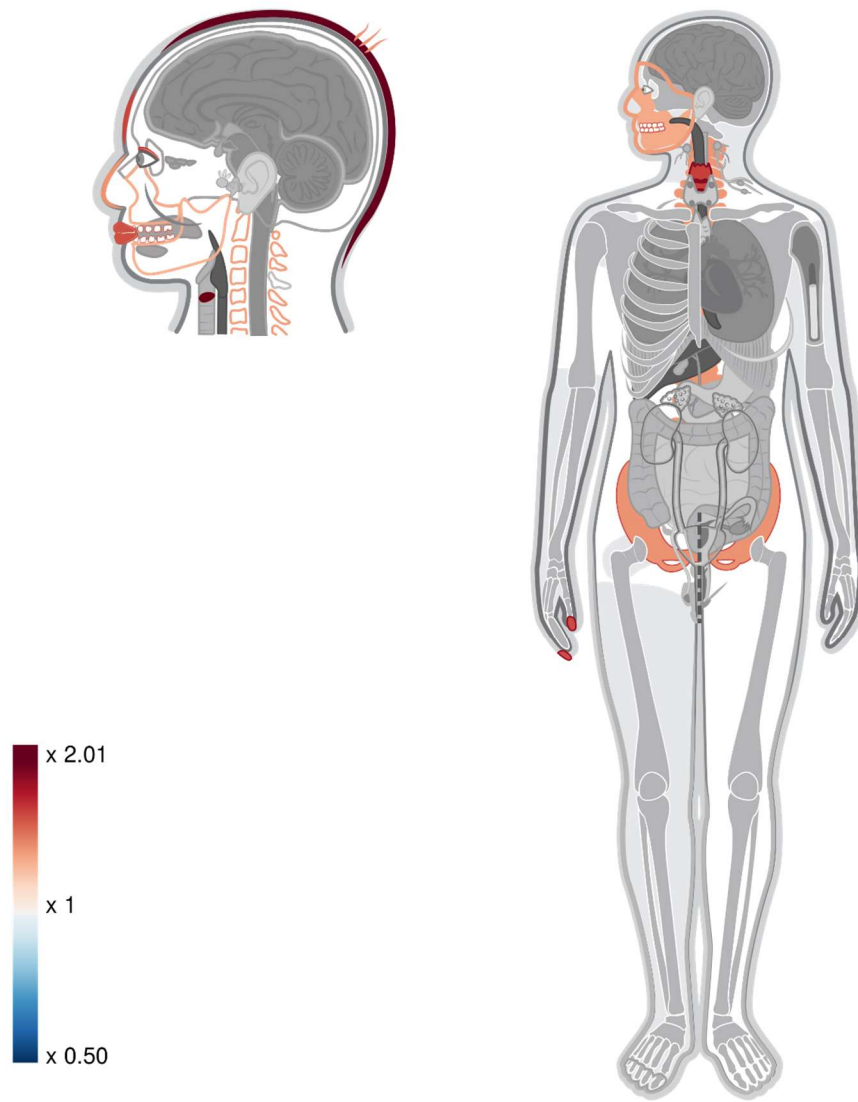

**Figure S1.** A heat map representing the level of enrichment of each anatomical part within the list of old and new DMGs based on union-TADs. Only body parts that are significantly enriched ( $FDR < 0.05$ ) are colored.
